# Supplementary material for: ARNT-dependent HIF-2α signaling protects cardiac microvascular barrier integrity and heart function post-myocardial infarction
Source: Springer Nature journal article supplement (doi:10.1038/s42003-025-07753-1), 2025-03-15
Supplement: MOESM2 [file 42003_2025_7753_MOESM2_ESM.pdf › 42003_2025_7753_MOESM2_ESM.pdf]

# Supplemental Figures

**A**

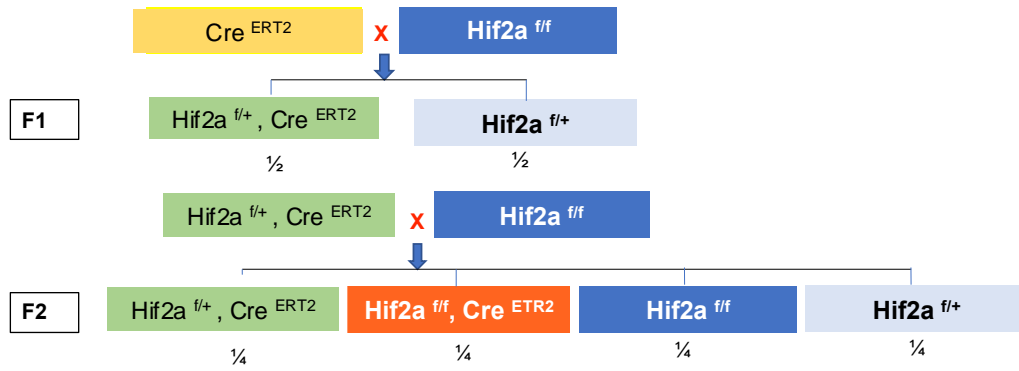

**B**

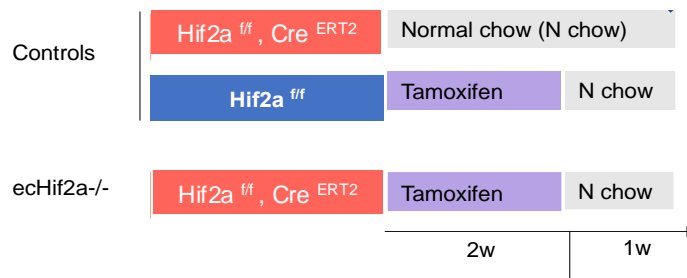

**C**

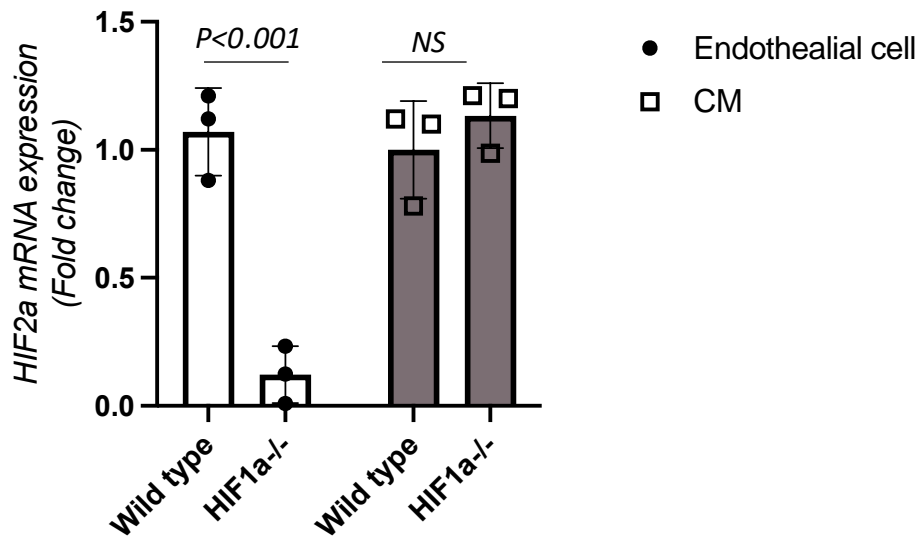

**Supplemental Fig 1:** Schematic Diagram of Generating Adult Inducible ecHIF2α<sup>-/-</sup> Mice and confirmation of HIF2α gene deletion . A) Breeding Strategy for Achieving Hif2a Deletion After Tamoxifen Induction. The breeding plan illustrates the generation of different genotypes. All possible genotypes are indicated for both the F1 (first filial generation) and F2 (second filial generation obtained by crossing the F1 generation). B) Schematic Representation of Tamoxifen Treatment in Each Experimental Group. The figure outlines the tamoxifen treatment regimen for each experimental group, facilitating the induction of Hif2a deletion in adult inducible ecHIF2α<sup>-/-</sup> mice. C) HIF2α mRNA expression from primary isolated endothelial cell and cardiomyocytes.(CM) Data are presented as mean ± SEM (n=3 mice) for each group.

**A**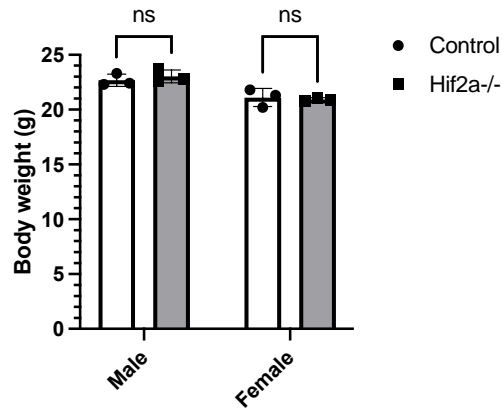**B**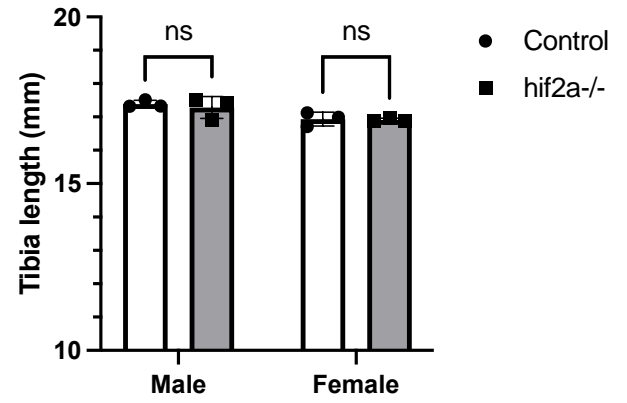**C**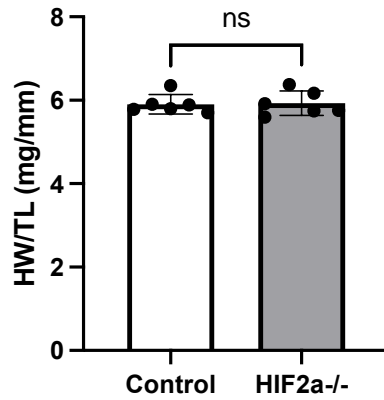**D**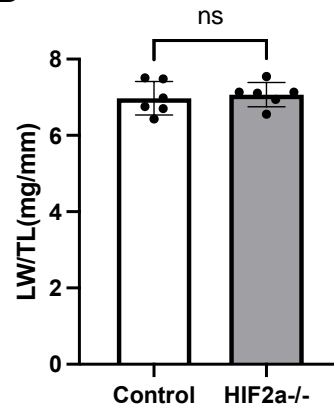

**Supplemental Fig 2:** Absence of Phenotypic Changes One Month After Tamoxifen-Induced Hif2a Deletion. A. Comparison of Body Weight between Female and Male Control and Hif2a<sup>-/-</sup> Mice at the Age of 3 Months. B. Assessment of Tibia Length in Various Groups of Animals. C. Calculation of the Heart Weight to Tibia Length Ratio. D. Determination of the Lung Weight to Tibia Length Ratio. Data are presented as mean  $\pm$  SEM (n=3-6) for each group.

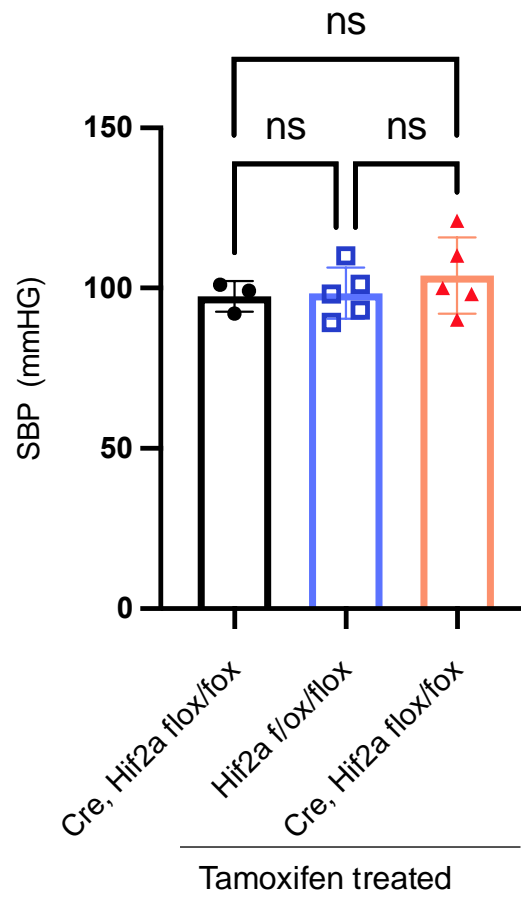

**Supplemental Fig 3.** Measurement of systolic blood pressure using the tail-cuff method. No significant difference was observed among the study groups. Data is shown as mean  $\pm$  SEM in mmHg. (n=3-6).

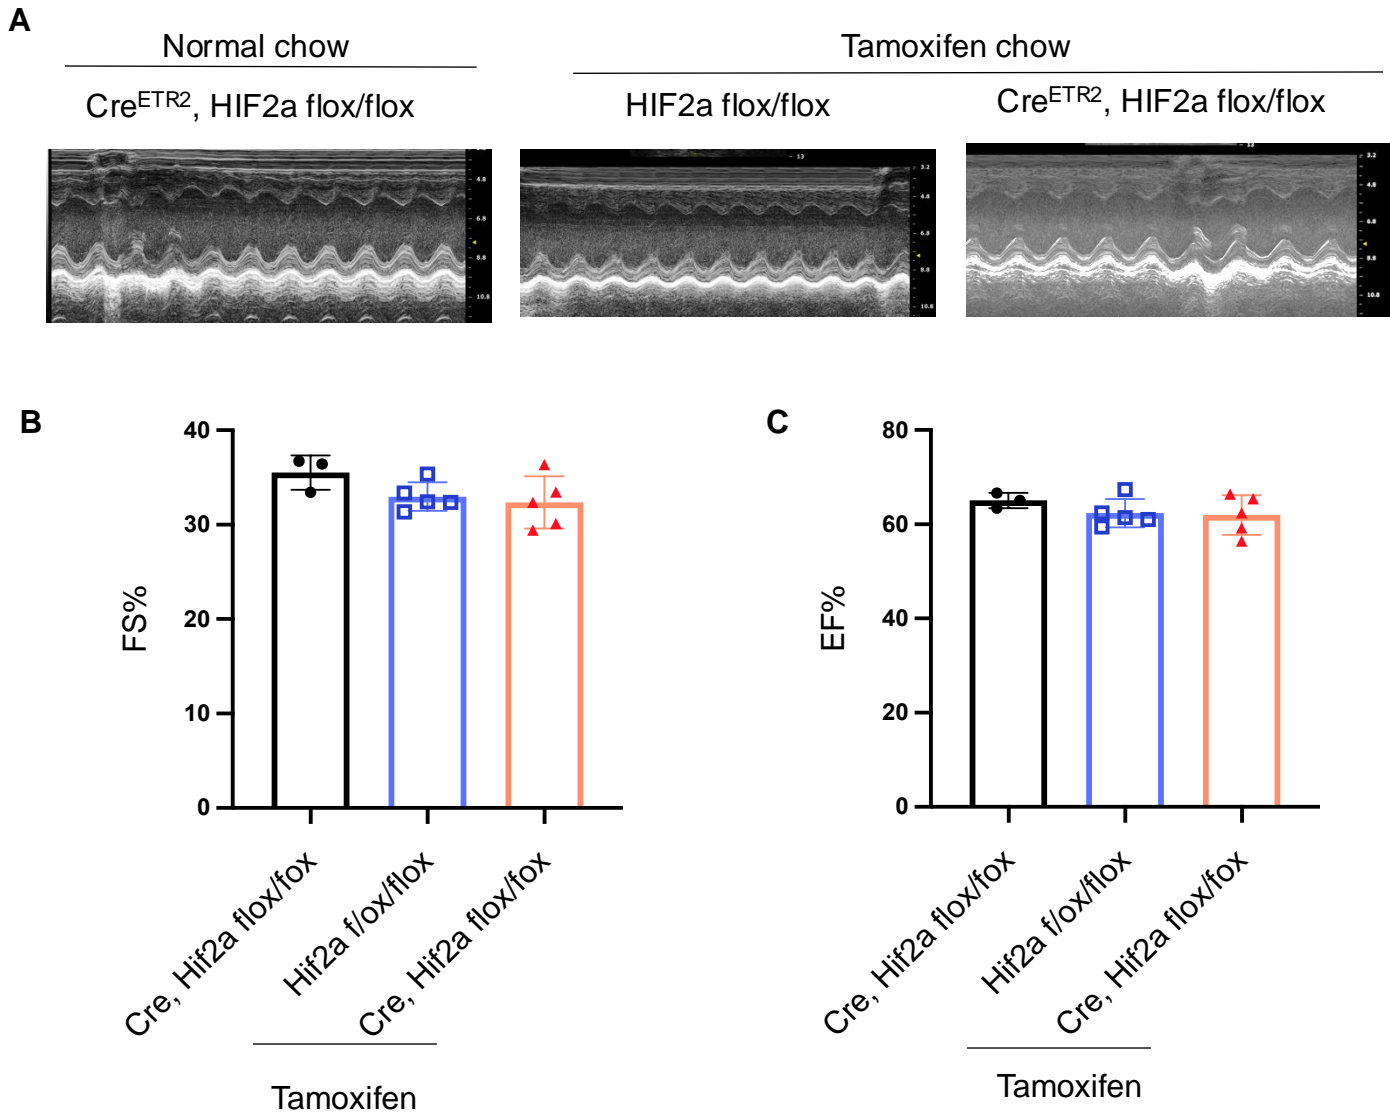

**Supplemental Fig 4.** Echocardiographic Assessment of Cardiac Function in Different Experimental Mouse Groups: (A) Representative M-mode echocardiographic images from the indicated mouse groups, 2 weeks post-tamoxifen administration. (B) Fractional shortening (FS%) and (C) Ejection fraction (EF%). Data are presented as mean ± SEM, n=3-6.

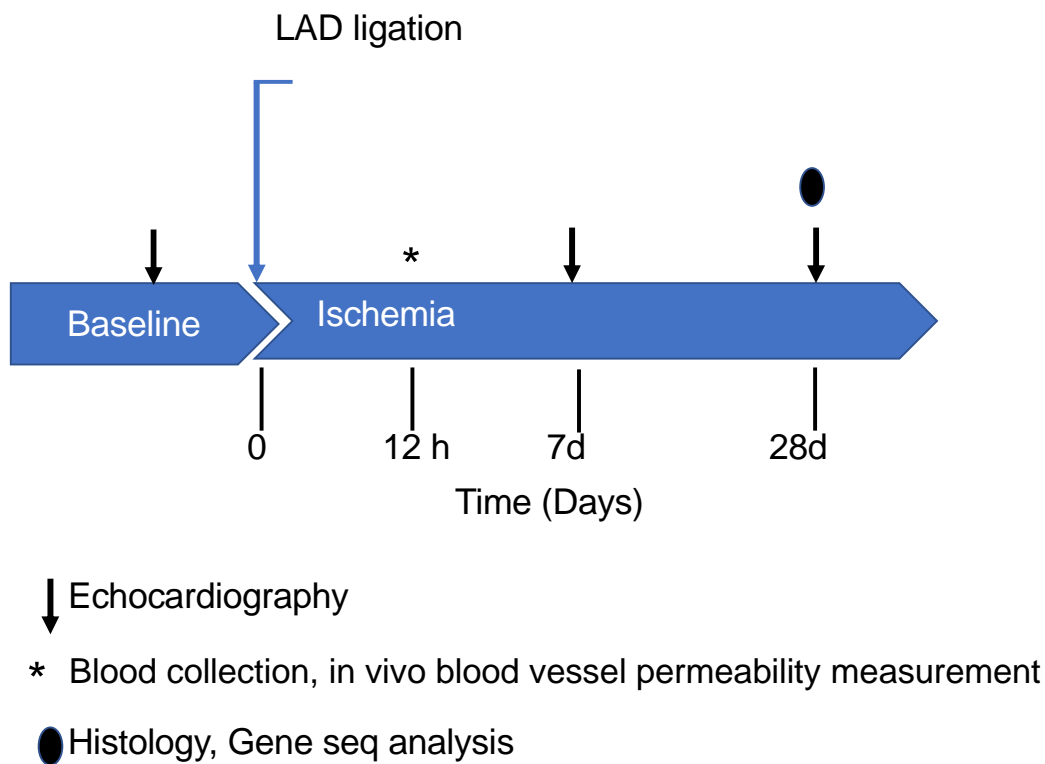

**Supplemental Fig 5.** Schematic Overview of the Myocardial Infarction (MI) Experimental Protocol: MI was induced by permanent ligation of the left anterior descending (LAD) coronary artery. Subsequent assessments, including echocardiography, blood sample collection, in vivo blood vessel permeability tests, histological examinations, and gene sequencing analyses from the mouse hearts, were conducted at the specified time points as indicated.

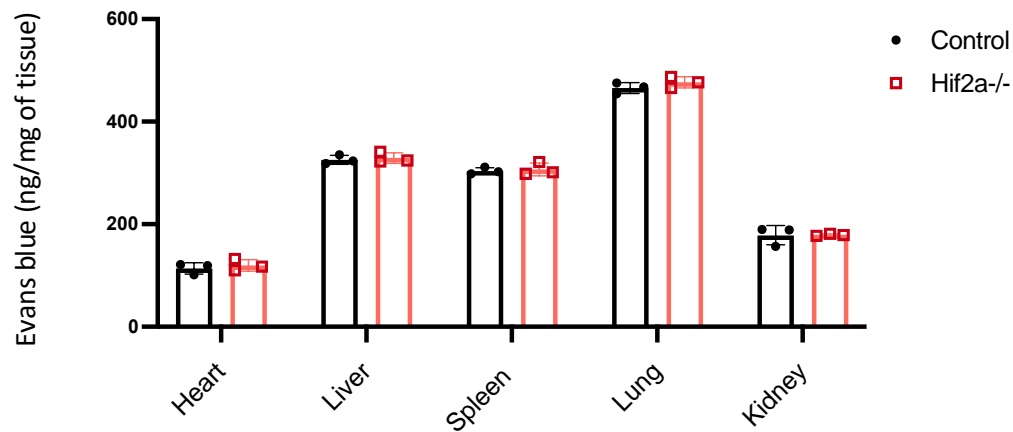

**Supplemental Fig 6.** Quantification of Evans Blue extravasation in different mouse tissues under normoxic conditions. Mice were either control (Hif2 $\alpha$  flox/flox) or underwent hif2 $\alpha$  deletion for two weeks. Post 0.5% Evans Blue injection (30-min duration), mice were euthanized via cervical dislocation. Tissue samples (50-100 mg) were treated with formamide to extract the extravasated Evans Blue. The optical density was measured at 610 nm, with values converted into ng of Evans Blue dye per mg of tissue. Data are presented as mean  $\pm$  SEM (n=3)

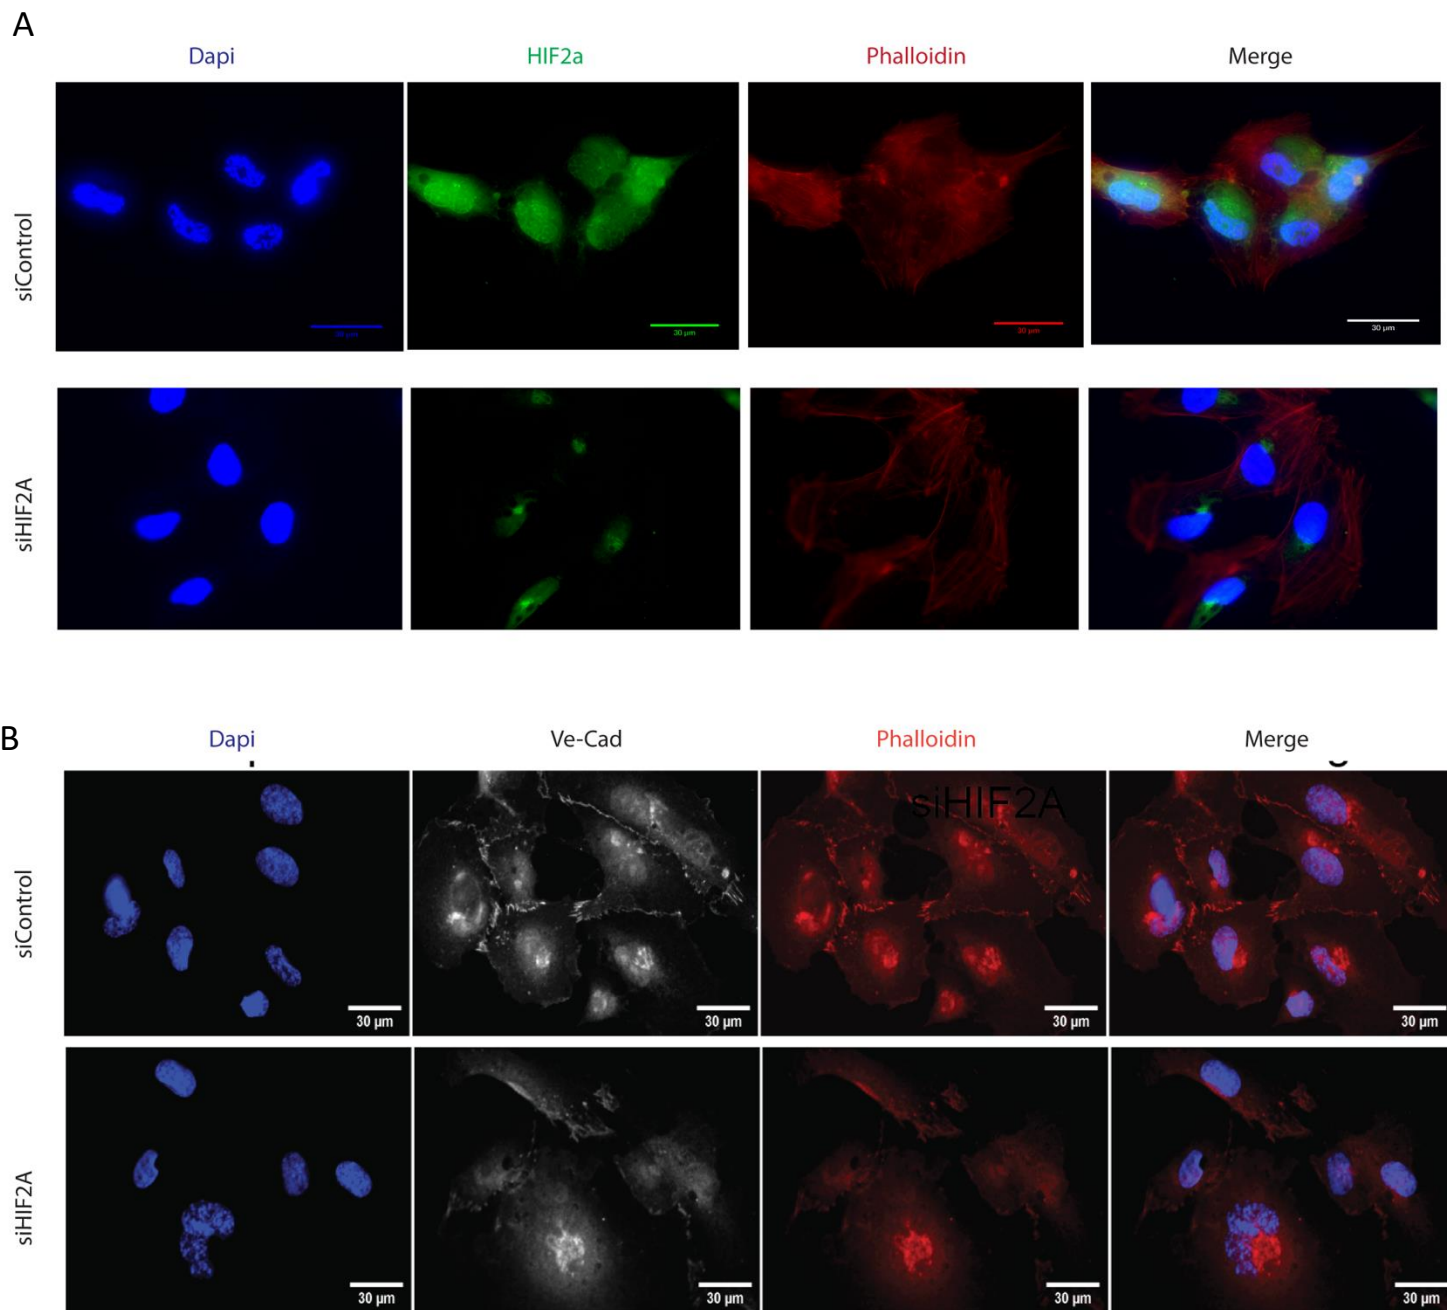

**Supplemental Fig 7. Immunofluorescent stating of HIF2A and Ve-Cadherin (Ve-Cad) expression in primary HMVECs.** (A) Immunofluorescent staining of 4% PFA fixed human microvascular endothelial cells transfected with either control siRNA or HIF2A siRNA. Cells were exposed to 1% oxygen for overnight and analyzed with indicated antibodies. Anti-HIF2a (green), DAPI (blue), and phalloidin (red) are shown. Scale bar is 30 uM. (B) Immunofluorescent staining of 4% PFA fixed HUVECs transfected with either control or HIF2A siRNA. Cells were stained with anti-VE cadherin (white), DAPI (blue), and phalloidin (red). The scale bar is 30 uM.



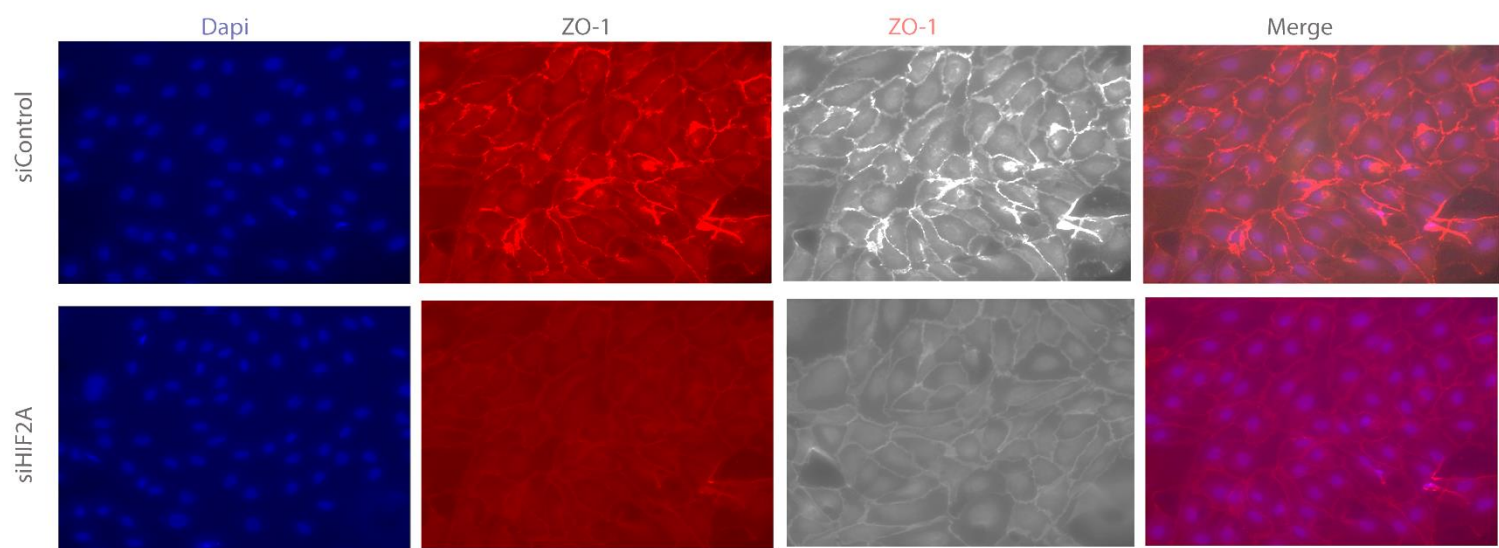

**Supplemental Figure 8:** Immunofluorescent stating of ZO-1 in HMVECs transfected with or without siHIF2A and exposed to 1% oxygen for overnight. Nucleus were stained with Dapi (Blue) and, ZO-1 (Red). The scale bar denotes 30µM

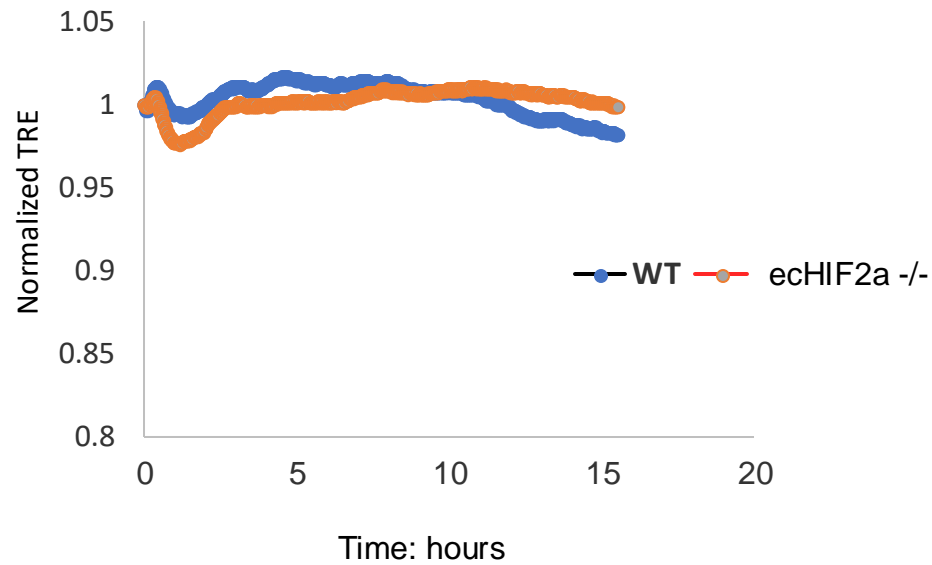

**Supplemental Fig 9:** Assessment of Endothelial Barrier Integrity: Endothelial barrier function was evaluated using primary cardiac microvascular endothelial cells (CMVECs) isolated from control wild-type and ecHIF2a  $-/-$  mice under normoxic conditions. Trans-endothelial Electrical Resistance (TER) was normalized and measured using the Electric Cell-substrate Impedance Sensing (ECIS) system. Data represent findings from three independent experiments (n=3).

**A**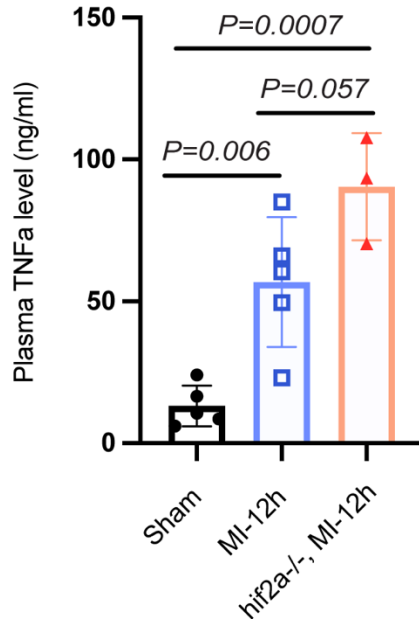**B**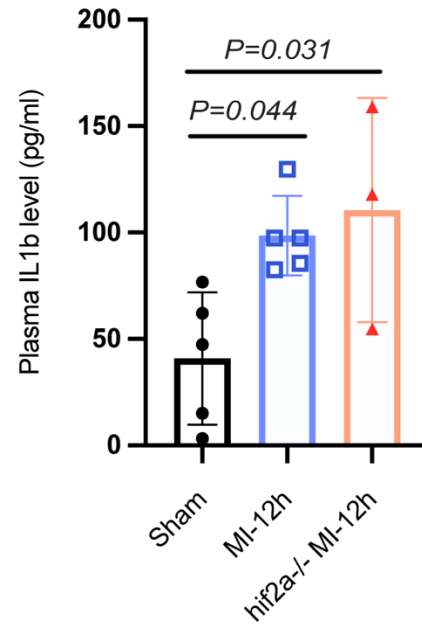

**Online Supplemental Figure 10.** ELISA of Mouse plasma TNF- $\alpha$  (A) and IL1b(B) levels.. 50  $\mu$ L of blood was collected from the tail vein 12h after surgery in different experimental groups as indicated. Plasma harvested from sham operated on HIF2a f/f mice served as control. The levels of TNF- $\alpha$  and IL-1b in the plasma of both MI groups were significantly higher than in sham. Data is shown as mean  $\pm$  SEM. n=3-5

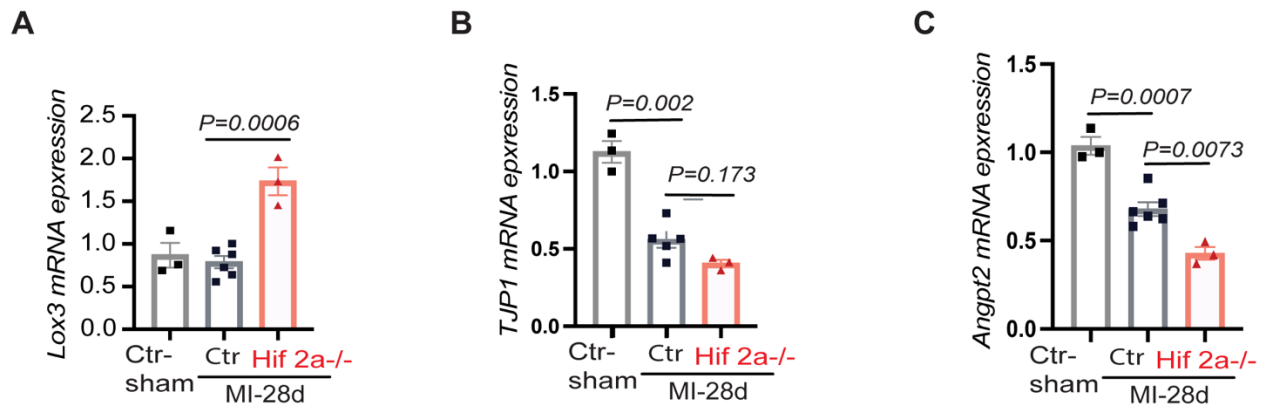

**Supplemental Fig11:** qPCR analysis showing the mRNA levels of Lox3, TJP1, and Angpt2 obtained from isolated RNA samples derived from various mouse hearts. The data are expressed as the mean  $\pm$  SEM (standard error of mean), with the number of samples ranging from 3 to 6.

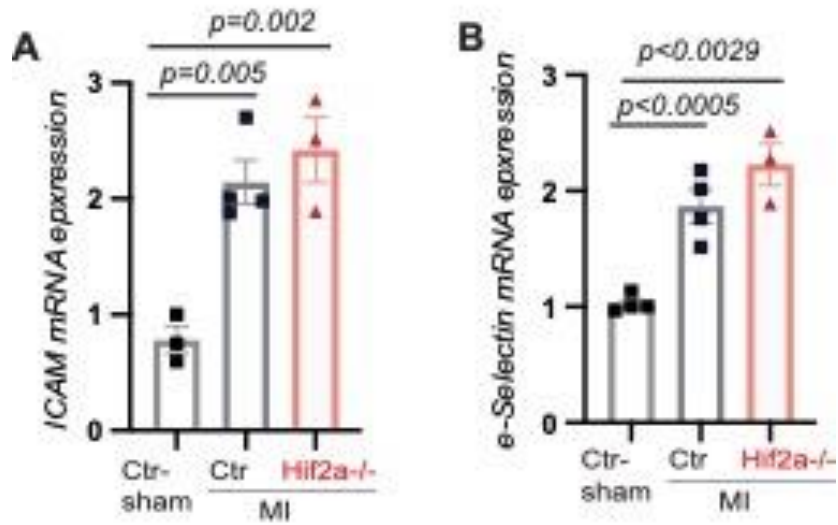

**Online Supplemental Figure 12:** mRNA levels of inflammatory markers, ICAM and e-Selectin, derived from mouse hearts after 28 days post-myocardial infarction. The data are presented as mean ± SEM, n=3-4..

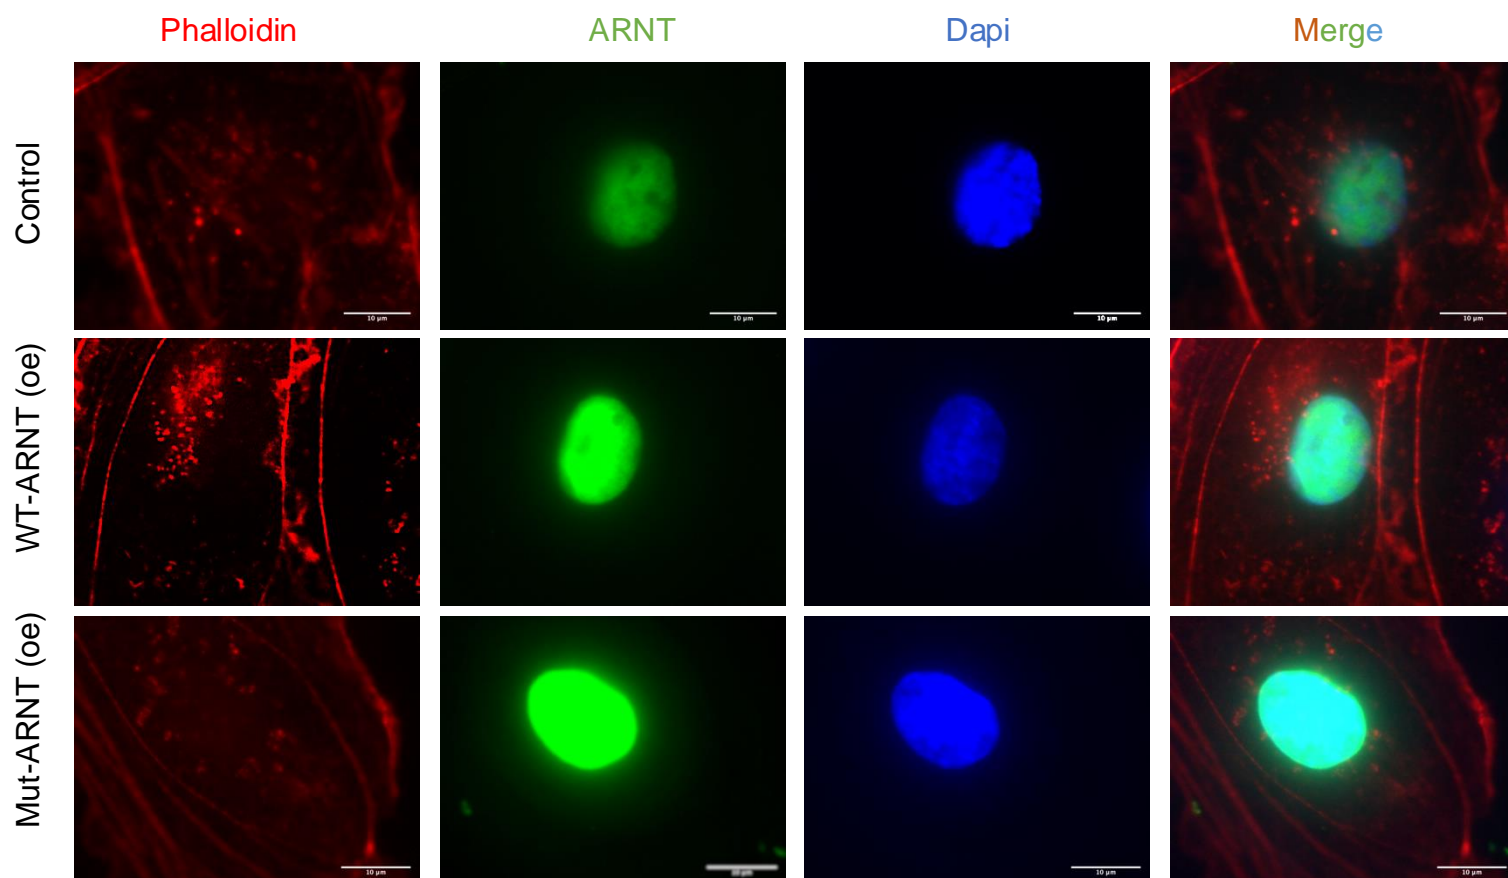

**Supplemental Figure 13:** Immunofluorescent staining of ARNT expression in HMVECs. ARNT overexpression was induced via lentiviral transduction in HMVECs for a period of 48-72 hours, followed by exposure to 1% hypoxia overnight. The respective stains were: ARNT (green), DAPI (blue), and Phalloidin (red).

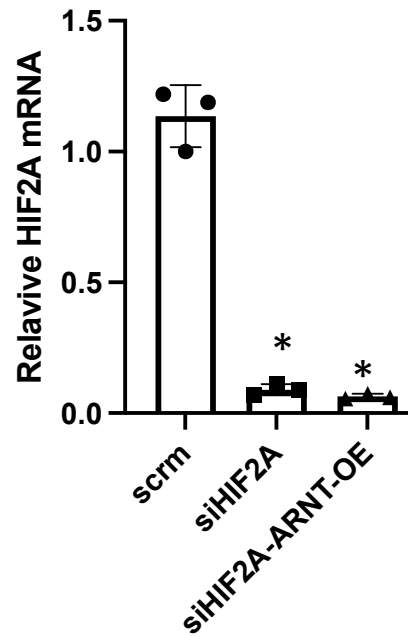

**Supplemental Figure 14:** *HIF2A* mRNA Expression Analysis in HMVECs by qPCR. Human microvascular endothelial cells (HMVECs) were subjected to various experimental conditions. These included transfection with scrambled siRNA (scrm), transfection with HIF2 $\alpha$  siRNA, and co-transfection with either an empty vector or a vector encoding human recombinant ARNT (ARNT-oe). Following these procedures, cells were exposed to 1% oxygen overnight. Results are presented as mean  $\pm$  SEM. \*P < 0.001 when compared to the Scrambled (scrm) group.

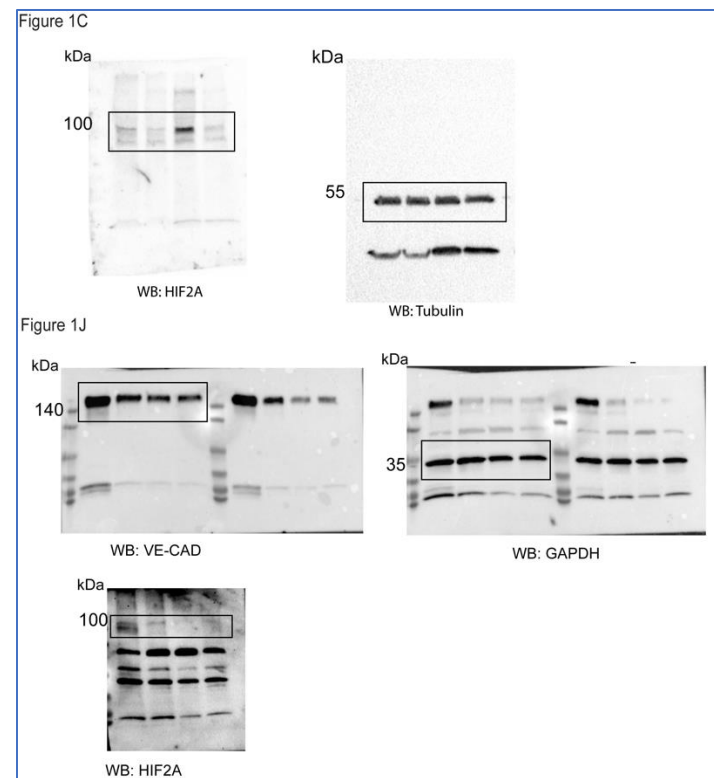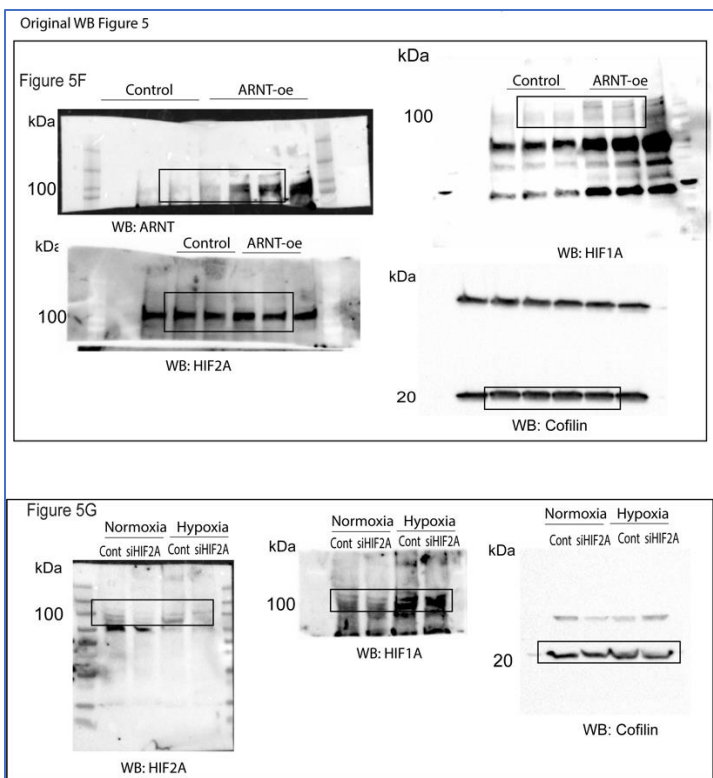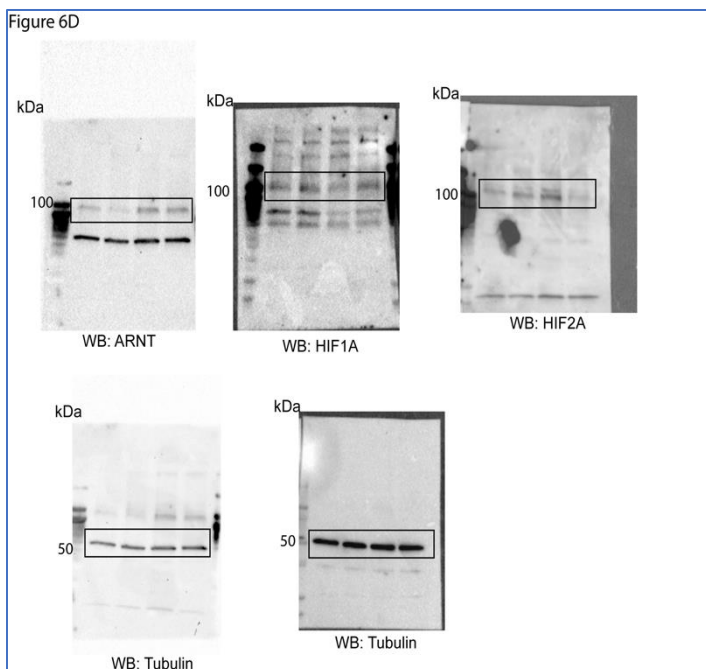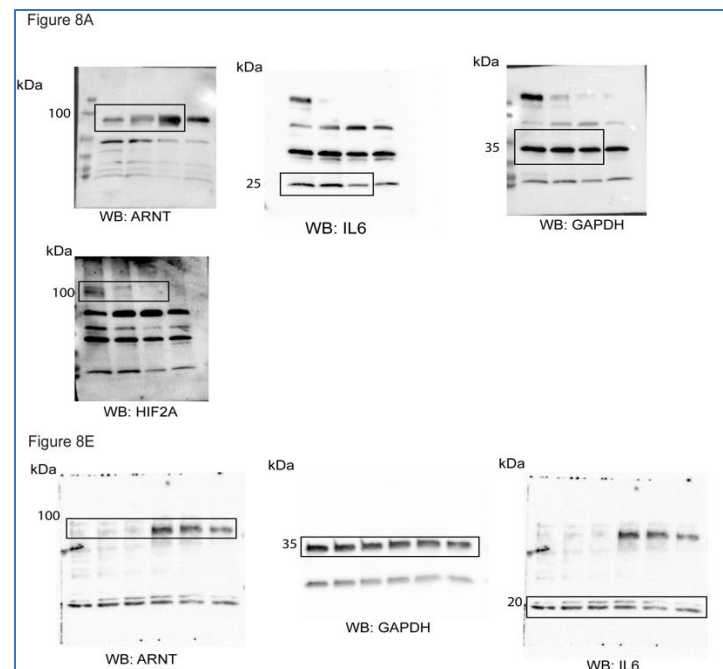

## Supplementary Figure 15. Uncropped Western Blot Images Corresponding to Main Figures

This figure presents the uncropped Western blot images corresponding to the blots displayed in the main figures. (A) Uncropped Western blot images for Figure 1C, showing HIF-2 $\alpha$  expression with Tubulin as a loading control. (B) Uncropped Western blot images for Figure 1J, displaying VE-Cadherin, GAPDH, and HIF-2 $\alpha$  expression. (C) Uncropped Western blot images for Figure 6D, showing ARNT, HIF-1 $\alpha$ , HIF-2 $\alpha$ , and Tubulin expression. (D) Uncropped Western blot images for Figure 5F, depicting ARNT, HIF-1 $\alpha$ , HIF-2 $\alpha$ , and Cofilin expression in control and ARNT-overexpressing conditions. (E) Uncropped Western blot images for Figure 5G, showing HIF-1 $\alpha$ , HIF-2 $\alpha$ , and Cofilin expression under normoxia and hypoxia conditions. (F) Uncropped Western blot images for Figure 8A, demonstrating ARNT, IL-6, HIF-2 $\alpha$ , and GAPDH expression. (G) Uncropped Western blot images for Figure 8E, displaying ARNT, IL-6, and GAPDH expression. Molecular weight markers (kDa) are indicated on the left of each blot.



Supplementary Table 1 . DEG of HIF2a<sup>-/-</sup> vs WT after MI-28 d

|         | logFC      | logCPM     | LR         | PValue     | FDR        |
|---------|------------|------------|------------|------------|------------|
| Col13a1 | 2.55067543 | 1.22925484 | 26.0651585 | 3.30E-07   | 0.00015422 |
| Esm1    | 2.52793941 | 1.84464138 | 18.3599412 | 1.83E-05   | 0.00452315 |
| Car9    | 2.01142864 | 1.01873362 | 16.347044  | 5.27E-05   | 0.01057446 |
| Slco2a1 | 1.93163626 | 3.81903308 | 68.1618213 | 1.51E-16   | 6.33E-13   |
| Exoc3l2 | 1.8974996  | 2.59713576 | 18.2646215 | 1.92E-05   | 0.00457578 |
| Piezo2  | 1.79996398 | 3.64868569 | 67.0931664 | 2.59E-16   | 8.17E-13   |
| Plvap   | 1.76701693 | 5.21075091 | 104.536545 | 1.54E-24   | 1.95E-20   |
| F19Rik  | 1.71186239 | 2.61711115 | 13.1352164 | 0.0002898  | 0.03248766 |
| Jchain  | 1.70318527 | 6.59792369 | 19.0754398 | 1.26E-05   | 0.00337254 |
| Snca    | 1.66497252 | 1.19695183 | 16.0724049 | 6.10E-05   | 0.01149653 |
| Msln    | 1.65040818 | 3.09611165 | 12.1693304 | 0.00048582 | 0.04750842 |
| Alas2   | 1.64240039 | 4.31734513 | 77.9459625 | 1.06E-18   | 6.68E-15   |
| Ces2e   | 1.6066815  | 2.23073148 | 24.3841465 | 7.89E-07   | 0.00034323 |
| Stc1    | 1.47888144 | 3.26425556 | 17.9590513 | 2.26E-05   | 0.00508449 |
| Igfbp3  | 1.34372331 | 6.08102208 | 45.7751834 | 1.33E-11   | 1.86E-08   |
| Tent5c  | 1.2547628  | 3.14386982 | 26.836767  | 2.21E-07   | 0.00011171 |
| Kif21b  | 1.25391684 | 2.75690013 | 15.6252383 | 7.72E-05   | 0.01334374 |
| Myoc    | 1.2417222  | 4.45780477 | 35.3173635 | 2.80E-09   | 2.52E-06   |
| Myh7    | 1.23523556 | 11.8126282 | 15.7166193 | 7.36E-05   | 0.01289093 |
| Emcn    | 1.21882606 | 5.38875445 | 39.5667921 | 3.17E-10   | 3.22E-07   |
| Hba-a1  | 1.2188222  | 8.99525322 | 51.7165739 | 6.41E-13   | 1.35E-09   |
| Hbb-bs  | 1.20250512 | 9.3344451  | 48.0480602 | 4.16E-12   | 6.56E-09   |
| Hba-a2  | 1.20121413 | 8.87586025 | 49.455027  | 2.03E-12   | 3.66E-09   |
| Enpp6   | 1.17700114 | 3.19966799 | 24.0547444 | 9.36E-07   | 0.00036913 |
| Hbb-bt  | 1.17303284 | 8.51529643 | 44.1583905 | 3.03E-11   | 3.82E-08   |
| Lars2   | 1.16357754 | 9.63265117 | 29.4802288 | 5.65E-08   | 3.39E-05   |
| Runx3   | 1.15929048 | 2.72725274 | 14.8686166 | 0.00011526 | 0.01690773 |
| Sh3rf3  | 1.13932259 | 2.90414283 | 18.3814374 | 1.81E-05   | 0.00452315 |
| Ccn5    | 1.08762603 | 7.29129991 | 34.7169216 | 3.81E-09   | 3.21E-06   |
| C7      | 1.06887614 | 4.66649465 | 12.0835378 | 0.00050869 | 0.04936248 |
| Capn5   | 1.06865929 | 2.82968401 | 16.3910847 | 5.15E-05   | 0.01057446 |
| Egln3   | 1.06273241 | 6.66733626 | 22.830674  | 1.77E-06   | 0.00065642 |
| Cilp    | 1.00894224 | 8.97275801 | 28.9723514 | 7.34E-08   | 4.16E-05   |
| Lgals3  | 0.99519935 | 4.72889396 | 30.2132455 | 3.87E-08   | 2.44E-05   |

Supplementary Table 1 (continued). DEG of HIF2a<sup>-/-</sup> vs WT after MI-28 d

|               | logFC      | logCPM     | LR         | PValue     | FDR        |
|---------------|------------|------------|------------|------------|------------|
| Slit3         | 0.96581333 | 5.47791007 | 24.0870475 | 9.21E-07   | 0.00036913 |
| Rnf152        | 0.9616726  | 3.23492763 | 15.9591599 | 6.47E-05   | 0.01200722 |
| Col13a2       | 0.76209899 | 6.90714998 | 23.6070053 | 5.18E-05   | 0.00644727 |
| Esm2          | 0.72649619 | 7.01867232 | 23.1656048 | 5.18E-05   | 0.0064334  |
| Car10         | 0.6908934  | 7.13019466 | 22.7242044 | 5.17E-05   | 0.00641952 |
| Slco2a2       | 0.6552906  | 7.241717   | 22.2828039 | 5.17E-05   | 6.41E-03   |
| Exoc3l3       | 0.6196878  | 7.35323935 | 21.8414034 | 5.17E-05   | 0.00639177 |
| Piezo3        | 0.58408501 | 7.46476169 | 21.4000029 | 5.17E-05   | 6.38E-03   |
| Plvap         | 0.54848221 | 7.57628403 | 20.9586024 | 5.17E-05   | 6.36E-03   |
| 9330159F19Rik | 0.51287941 | 7.68780637 | 20.5172019 | 5.166E-05  | 0.00635015 |
| Jchain        | 0.47727662 | 7.79932871 | 20.0758015 | 5.16E-05   | 0.00633627 |
| Snca          | 0.44167382 | 7.91085106 | 19.634401  | 5.16E-05   | 0.0063224  |
| Msln          | 0.40607102 | 8.0223734  | 19.1930005 | 5.1607E-05 | 0.00630852 |
| Alas3         | 0.37046823 | 8.13389574 | 18.7516    | 5.16E-05   | 6.29E-03   |
| Lox           | 0.81714984 | 7.27597884 | 20.963076  | 4.68E-06   | 0.00146163 |
| Itgbl1        | 0.80462595 | 7.34989121 | 20.958131  | 4.69E-06   | 0.00146163 |
| Pdgfrl        | 0.80428732 | 5.10176248 | 19.5061013 | 1.00E-05   | 0.00277492 |
| Ptgs1         | 0.78183174 | 4.25744613 | 15.7175662 | 7.35E-05   | 0.01289093 |
| Scarf2        | 0.77810728 | 4.23148374 | 13.6194805 | 0.00022385 | 0.02715265 |
| Dennd4a       | 0.77674329 | 5.45662555 | 20.0433934 | 7.57E-06   | 0.00217049 |
| Gucy1a1       | 0.76610019 | 5.42728671 | 12.6769619 | 0.00037019 | 0.03766072 |
| Setbp1        | 0.75646676 | 4.78986256 | 15.1878484 | 9.73E-05   | 0.01554163 |
| Spon1         | 0.75603503 | 5.95435382 | 14.2138257 | 0.00016317 | 0.02122015 |
| Rai14         | 0.73572558 | 4.49008574 | 13.6858455 | 0.00021608 | 0.02646418 |
| Ahnak2        | 0.73217068 | 5.67500665 | 18.0544293 | 2.15E-05   | 0.00492395 |
| Ddah1         | 0.72883449 | 5.0957387  | 14.3383523 | 0.00015272 | 0.02006858 |
| Errfi1        | 0.72074541 | 5.93093728 | 15.0742212 | 0.00010337 | 0.01629941 |
| Cybb          | 0.7207042  | 4.72432158 | 13.9960554 | 0.00018319 | 0.02301031 |
| Pfkfb3        | 0.72050776 | 5.0066907  | 16.786553  | 4.18E-05   | 0.00909773 |
| Lbp           | 0.71858161 | 4.4865724  | 14.4344749 | 0.00014512 | 0.01927057 |
| P3h2          | 0.71759118 | 3.95445544 | 12.1771252 | 0.00048379 | 0.04750842 |
| Gja4          | 0.71161634 | 4.05693967 | 12.8876648 | 0.00033075 | 0.03477061 |
| Eln           | 0.71098612 | 8.22959671 | 18.1325725 | 2.06E-05   | 0.00481348 |
| Kcne4         | 0.70995039 | 4.20680353 | 13.947968  | 0.00018794 | 0.02324384 |
| Cyp2d22       | 0.70781119 | 4.58769398 | 14.9416521 | 0.00011089 | 0.01690773 |

Supplementary Table 1 (continued). DEG of HIF2a<sup>-/-</sup> vs WT after MI-28 d

|          | logFC      | logCPM     | LR         | PValue     | FDR        |
|----------|------------|------------|------------|------------|------------|
| Cygb     | 0.70726588 | 7.37795793 | 18.602616  | 1.61E-05   | 0.00414491 |
| Thbs3    | 0.7068232  | 4.94627804 | 12.5028317 | 0.00040634 | 0.04068194 |
| Rbp1     | 0.70484566 | 4.77743201 | 15.3761292 | 8.81E-05   | 0.01461876 |
| Serping1 | 0.69262027 | 8.38559646 | 15.3909249 | 8.74E-05   | 0.01461876 |
| Fxyd6    | 0.67578739 | 6.44452933 | 14.8975795 | 0.00011351 | 0.01690773 |
| Thbs2    | 0.67097968 | 6.70869351 | 15.7990119 | 7.04E-05   | 0.01269417 |
| Npr3     | 0.66574252 | 5.09744304 | 14.5098918 | 0.00013943 | 0.01927057 |
| Tmem176a | 0.6557902  | 4.6799927  | 12.9282203 | 0.00032367 | 0.03431125 |
| Itgb5    | 0.64786266 | 8.04085376 | 14.5187335 | 0.00013877 | 0.01927057 |
| Kirrel   | 0.64345879 | 5.43138351 | 14.6634278 | 0.00012852 | 0.01842303 |
| Dpep1    | 0.64243188 | 6.1937619  | 15.3566693 | 8.90E-05   | 0.01461876 |
| Loxl3    | 0.63239295 | 5.89704709 | 14.6191619 | 0.00013157 | 0.01864893 |
| Ptprj    | 0.63228891 | 5.18766243 | 13.4164432 | 0.00024943 | 0.0291346  |
| C1qtnf6  | 0.62952098 | 5.08497225 | 13.1273818 | 0.00029101 | 0.03248766 |
| Col8a2   | 0.62576279 | 6.06994926 | 13.1885791 | 0.00028166 | 0.03230132 |
| Prss23   | 0.6222481  | 5.5205872  | 14.0059914 | 0.00018223 | 0.02301031 |
| Timp4    | -0.6188735 | 5.87820593 | 12.7529702 | 0.00035544 | 0.03698951 |
| Ppif     | -0.6297298 | 6.95944802 | 13.0952569 | 0.00029604 | 0.03268498 |
| Gpam     | -0.6406637 | 7.84370177 | 12.7409992 | 0.00035773 | 0.03698951 |
| Hspa4l   | -0.6841529 | 6.12491124 | 15.2789267 | 9.27E-05   | 0.01499979 |
| Fabp4    | -0.7185635 | 8.21414492 | 16.2124039 | 5.66E-05   | 0.01115198 |
| Myh7b    | -0.7767873 | 4.86164366 | 14.8805333 | 0.00011454 | 0.01690773 |
| Fkbp4    | -0.7887051 | 7.26876334 | 13.5709703 | 0.00022971 | 0.02759809 |
| C1qtnf9  | -0.7962827 | 5.1018469  | 15.3519111 | 8.92E-05   | 0.01461876 |
| Sox7     | -0.8068756 | 4.43318874 | 17.1256659 | 3.50E-05   | 0.00774302 |
| Dhrs7c   | -0.838604  | 5.47265022 | 13.3473177 | 0.00025879 | 0.02995108 |
| Mdga1    | -0.8546905 | 3.49816875 | 12.5245155 | 0.00040165 | 0.04053422 |
| Hopx     | -0.8844896 | 6.62400382 | 16.0694978 | 6.11E-05   | 0.01149653 |

Supplementary Table 1 (continued). DEG of HIF2a<sup>-/-</sup> vs WT after MI-28 d

|          | logFC      | logCPM     | LR         | PValue     | FDR        |
|----------|------------|------------|------------|------------|------------|
| Cygb     | -1.067621  | 5.65021975 | 14.1323203 | 2.06E-04   | 0.02475167 |
| Zfhx2    | -0.8962505 | 4.00893165 | 16.368768  | 5.21E-05   | 0.01057446 |
| Meox2    | -0.899809  | 3.53341272 | 12.9953625 | 0.00031226 | 0.03361101 |
| Slc28a2  | -0.901964  | 4.44842764 | 20.383295  | 6.34E-06   | 0.00185941 |
| Adam11   | -0.9170832 | 3.71673908 | 13.5432066 | 0.00023313 | 0.02774511 |
| Hr       | -0.9562224 | 5.27541117 | 25.6021674 | 4.20E-07   | 0.00018903 |
| Ppargc1a | -1.0062119 | 7.97256912 | 20.7698961 | 5.18E-06   | 0.00155557 |
| Folr2    | -1.0075601 | 3.21271463 | 15.0497066 | 0.00010472 | 0.01630863 |
| Mpp7     | -1.0110908 | 3.09574521 | 13.4776477 | 0.00024142 | 0.02846301 |
| Aqp7     | -1.0320828 | 3.90541618 | 14.4841663 | 0.00014134 | 0.01927057 |
| Myl1     | -1.0400831 | 4.97129982 | 26.6787334 | 2.40E-07   | 0.00011657 |
| Aqp1     | -1.0701726 | 8.40026378 | 34.5558167 | 4.14E-09   | 3.27E-06   |
| Depp1    | -1.080029  | 5.96423715 | 32.0339082 | 1.52E-08   | 1.06E-05   |
| Ano4     | -1.1018567 | 2.66785527 | 13.0307358 | 0.00030642 | 0.03332319 |
| Pdp2     | -1.1126567 | 4.63770454 | 14.4348312 | 0.00014509 | 0.01927057 |
| Cyp4b1   | -1.1147587 | 4.06848195 | 24.3191136 | 8.16E-07   | 0.00034323 |
| Car4     | -1.2279705 | 4.05862298 | 30.3933275 | 3.53E-08   | 2.34E-05   |
| Mylk4    | -1.2531217 | 7.6764429  | 21.8620131 | 2.93E-06   | 0.00097261 |
| Metrn    | -1.2672435 | 3.9006579  | 27.6194851 | 1.48E-07   | 7.76E-05   |
| Pdk4     | -1.2989933 | 10.3626438 | 39.4760747 | 3.32E-10   | 3.22E-07   |
| Scn4b    | -1.3213515 | 5.57239223 | 23.4282024 | 1.30E-06   | 0.00049567 |
| Stmn1    | -1.3559787 | 3.89583839 | 22.6392087 | 1.95E-06   | 0.0006664  |
| Ucp3     | -1.4062228 | 5.75234423 | 19.4888938 | 1.01E-05   | 0.00277492 |
| Adora2a  | -1.4962434 | 2.6214644  | 12.7178636 | 0.00036218 | 0.03714546 |
| Arc      | -1.6303966 | 1.86735476 | 14.0319633 | 0.00017973 | 0.02301031 |
| Ano5     | -1.7307574 | 1.88655154 | 14.4514116 | 0.00014382 | 0.01927057 |
| Ush1c    | -1.7385907 | 1.59504638 | 14.9092168 | 0.00011281 | 0.01690773 |
| Gfra2    | -1.7946495 | 1.26594621 | 13.9854745 | 0.00018423 | 0.02301031 |
| Cdh23    | -1.9302848 | 2.70195947 | 34.4096851 | 4.46E-09   | 3.31E-06   |
| Nrn1     | -1.9395085 | 3.07167424 | 40.8213526 | 1.67E-10   | 1.91E-07   |
| Angptl4  | -2.0929161 | 3.91272425 | 53.2661842 | 2.91E-13   | 7.35E-10   |

RNA-Seq analysis: Reactome analysis of 130 differentially expressed genes between control and ecHIF2a<sup>-/-</sup> after MI-28 days revealing that the majority of these genes are annotated to the regulation of extracellular matrix and collagen pathways.
