# Supplementary material for: ARNT-dependent HIF-2α signaling protects cardiac microvascular barrier integrity and heart function post-myocardial infarction
Source: Springer Nature journal article supplement (doi:10.1038/s42003-025-07753-1), 2025-03-15
Supplement: MOESM3 [file 42003_2025_7753_MOESM3_ESM.pdf › 42003_2025_7753_MOESM3_ESM.pdf]

## **Description of Additional Supplementary Files**

**File name:** Supplementary Data 1

**Description:** The data source is listed under the chart in the main paper as Supplementary data 1
